# Supplementary material for: Earth Science for all? The economic barrier to Geoscience conferences
Source: Copernicus journal article supplement (doi:10.5194/egusphere-2024-1653), 2024-06-11
Supplement: Supplementary file 1 [file egusphere-2024-1653-supplement.pdf]

1 **Supplementary data**

2

| Data                                                       | Source      | Link                                                                                                                        |
|------------------------------------------------------------|-------------|-----------------------------------------------------------------------------------------------------------------------------|
| Population                                                 | World Bank  | <a href="https://data.worldbank.org/indicator/SP.POP.TOTL">https://data.worldbank.org/indicator/SP.POP.TOTL</a>             |
| Gross National Income Per Capta (current international \$) | World Bank  | <a href="https://data.worldbank.org/indicator/NY.GNP.PCAP.PP.CD">https://data.worldbank.org/indicator/NY.GNP.PCAP.PP.CD</a> |
| EGU demographics                                           | EGU website | <a href="https://www.egu.eu/meetings/general-assembly/meetings/">https://www.egu.eu/meetings/general-assembly/meetings/</a> |
| Distance to conference site                                | Google Maps |                                                                                                                             |

3
