# Supplementary material for: Earth Science for all? The economic barrier to Geoscience conferences
Source: Copernicus journal article supplement (doi:10.5194/egusphere-2024-1653), 2024-06-11
Supplement: Supplementary file [file egusphere-2024-1653-RC1-supplement.pdf]

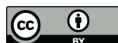

1 **Earth Science for all? The economic barrier to Geoscience**  
2 **conferences**

3 Francyne Bochi do Amarante<sup>1</sup> & Mauricio Barcelos Haag<sup>2</sup>

4 <sup>1</sup> Instituto de Geociências, Universidade Federal do Rio Grande do Sul, Porto Alegre, Brazil

5 Corresponding author. Francyne; email: [francyneb@gmail.com](mailto:francyneb@gmail.com)

6 <sup>2</sup> Department of Earth Sciences, University of Toronto, Toronto, Canada

7 Email: [mauricio.haag@mail.utoronto.ca](mailto:mauricio.haag@mail.utoronto.ca)

8

9 **Abstract**

10 Scientific meetings are vital for research development and networking. However, these  
11 events often perpetuate unconscious biases and barriers to diversity, particularly  
12 affecting ethnic minorities. The future success of geosciences depends on diversity,  
13 which enhances problem-solving and innovation through varied perspectives. This  
14 study examines the attendance diversity at the European Geosciences Union (EGU)  
15 General Assembly from 2005 to 2024, focusing on the impact of economic factors,  
16 distance, and population size on participation. Using publicly available data from the  
17 World Bank and EGU, this study finds that gross national income (GNI) is the primary  
18 determinant of attendance, with a strong correlation between GNI and participation,  
19 especially post-COVID. Distance also influences attendance but to a lesser extent,  
20 while population size shows a weak correlation. To improve diversity in academic  
21 conferences, we suggest facilitating donations, offering affordable accommodations,  
22 establishing additional travel funds, and rotating the conference location. Our actions  
23 must go beyond the EGU General Assembly and other geoscience conferences,  
24 extending to barriers to inclusivity within our community. By addressing these financial  
25 and systemic barriers, geoscience conferences can become more inclusive, benefiting  
26 the entire scientific community.

27



28

## 1. Introduction

29 Academic conferences are crucial for researchers to promote their work,  
30 establish new connections and collaborations through networking, and be informed of  
31 the up-to-date research that is taking place across the globe. Such events are also  
32 places where the identities of scientists are constructed and how scientists are  
33 perceived within their community, often inadvertently reinforcing unconscious biases.  
34 Scientific conferences tend to reproduce barriers to diversity in the geosciences,  
35 meaning there is an underrepresentation of people from ethnic minorities (King et al.,  
36 2018), who are therefore more likely to face barriers to their career progress.

37 Diversity is essential to the future success of geoscience. As a community, we  
38 tackle complex global problems that transcend artificial geographical boundaries  
39 imposed by historical biases (Raja et al., 2022). Some of these problems are urgent  
40 and can have dramatic consequences, such as natural resource depletion, disaster  
41 risk reduction, and climate change (Rogers et al., 2022). Addressing these subjects  
42 requires scholars with diverse backgrounds, including a representative mixture of  
43 cultures and ethnicities. Different perspectives and life experiences lead to unique  
44 questions and approaches to problem-solving, and inspire more creative alternatives  
45 to relevant challenges, ultimately leading to higher levels of scientific innovation  
46 (Medin and Lee, 2012; Hong and Page, 2004).

47 Within this context, scientific meetings play an important role in bringing  
48 together and promoting knowledge exchange among scholars from diverse  
49 backgrounds. But how diverse are geosciences meetings? Here, we probe into  
50 attendance figures for Europe's largest geoscience meeting, the European  
51 Geosciences Union (EGU) General Assembly, held in Vienna (Austria) since 2005.  
52 Using publicly available historical data (EGU, 2024), we highlight the persistence of  
53 economic factors as the primary control for conference attendance (Fig. 1). From our  
54 perspective of participating in the 2024 EGU assembly, we note that while the theme  
55 of Equality, Diversity, and Inclusion (EDI) is significantly featured in the conference  
56 program, the actual diversity observed falls short of ideal standards.

57

58



## 59                    2. Dataset and Methodology

60                    We examine geographical diversity and representation at the EGU General  
61                    Assembly (hereafter referred to as the *EGU meeting, assembly, or conference*), one  
62                    of the largest geosciences meetings in the world. For each country, we analyze  
63                    attendance figures from 2005 to 2024 relative to three variables: (i) distance to the  
64                    event, (ii) gross national income (GNI) per capita, and (iii) population size. All  
65                    demographics are publicly available and derived from the World Bank and EGU's  
66                    website (EGU, 2024 – see supplementary data). We favor these metrics because they  
67                    are simple and not codependent/derived from each other (e.g., the human  
68                    development index and Henley passport index, which derive from a series of political  
69                    and economic factors). Because the selected metrics vary over several orders of  
70                    magnitude and are not necessarily linearly correlated to participation, we calculate the  
71                    Spearman's rank correlation coefficient ( $\rho$ ) to examine their relative impact on EGU's  
72                    conference participation. To avoid post-COVID biases in travel patterns and truthfully  
73                    represent historical attendance trends, we exemplify these relationships by analyzing  
74                    data from the last pre-COVID edition of EGU's meeting, in 2019. In addition to  
75                    correlation coefficients, we compute income-independent over- and  
76                    underrepresentation by dividing the normalized attendance by the product of  
77                    population and the distance to the conference.

78

## 79                    3. Results

### 80                    3.1. Gross national income over time

81                    Over the years, EGU's assembly attendance exhibits a strong correlation GNI,  
82                    as illustrated in Figure 1, where the correlation coefficient ( $\rho$ ) typically exceeds 0.6.  
83                    Notably, these correlation values have consistently been significant at the 99%  
84                    confidence level, demonstrating remarkable stability throughout the EGU meeting's  
85                    history. This strong relationship between attendance and income is only disrupted by  
86                    countries with large populations, such as China and India (Fig. 2b). While there has  
87                    been a decreasing trend in the correlation between attendance and GNI since the  
88                    inception of the EGU assembly, the latter half of the 2010s witnessed a reversal of this  
89                    trend, with a notable increase in the correlation between attendees and GNI after



90 2015. Post-COVID metrics (2022 to 2024) reveal the strongest correlation ever  
91 recorded, with a  $p$  exceeding 0.8. Unsurprisingly, in the virtual versions of the event  
92 (held from 2020 onwards), this correlation between attendance and GNI is less strong  
93 ( $p < 0.6$ ; Fig. 1a).

94

### 95 3.2. Distance to conference site over time

96 The impact of distance to the conference site on attendance emerges as a  
97 secondary factor, with low correlation coefficients typically hovering around 0.35 (Fig.  
98 1). Although this correlation is relatively weak, it remains stable and statistically  
99 significant at the 95% confidence level over the years. Despite its independent  
100 influence, distance often interacts with GNI as a combined socioeconomic limiting  
101 factor, since individuals from more distant countries have higher travel expenses. This  
102 pattern is disrupted by distant, wealthy countries, such as Australia, Japan, and New  
103 Zealand, which have all maintained robust participation throughout EGU assembly's  
104 history (Fig. 2a). As expected, in virtual versions of the event, distance shows the  
105 weakest correlation with attendance (Fig. 1a,  $p < 0.4$ ).

106

### 107 3.3. Population over time

108 In contrast to gross national income, the total population of a country typically  
109 shows a poor correlation with attendance for the majority of EGU assembly's history,  
110 with  $p$  values consistently below 0.3 from 2005 to 2017 (Fig. 1). Despite that, there  
111 has been a steady increase in the correlation coefficient for population until 2018, with  
112 2012 marking the first instance of statistical significance at the 99% confidence  
113 interval. This is particularly noticeable by examining the change in attendance figures  
114 for populous countries such as India, China, and Indonesia during a 10-year pre-  
115 COVID period (2009-2019; Fig. 2). Nonetheless, post-COVID figures for 2022 to 2024  
116 indicate a significant drawback in this correlation, as evidenced by a  $p$  below 0.2,  
117 representing the lowest value ever recorded in EGU assembly's history. In the virtual  
118 versions of the assembly, held between 2020 and 2024, the population shows a  
119 stronger correlation ( $p \sim 0.4$ ) when compared with the in-person format of the event ( $p$   
120  $< 0.2$ ).

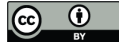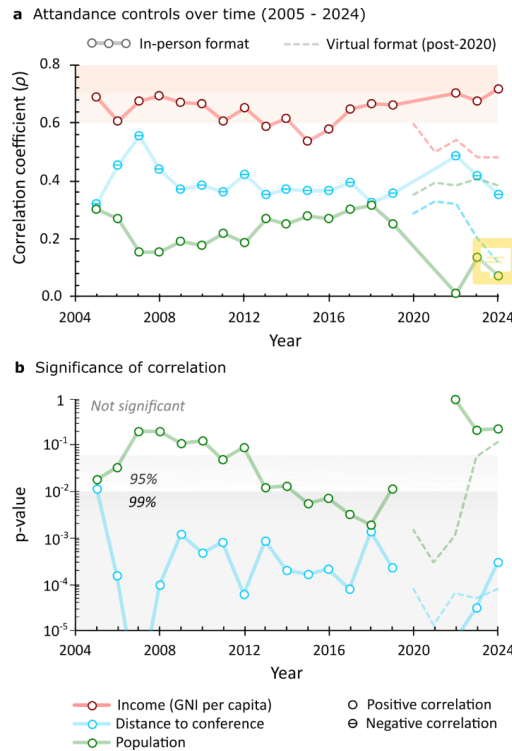

121

122 **Figure 1.** Correlation between the EGU General Assembly participants and distance to the conference,  
123 total population, and GNI per capita. (a) Spearman's rank correlation coefficient ( $\rho$ ) and (b) their  
124 respective significance (p-values); whenever a p-value is not visible it indicates that the p-value <  $10^{-5}$ .

125

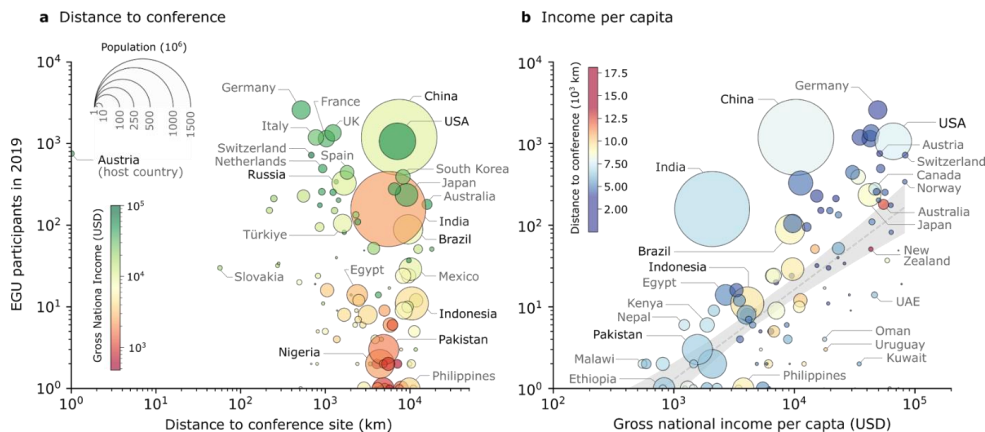

126

127 **Figure 2.** EGU's General Assembly attendance for the last pre-COVID meeting in 2019. a, participation  
128 vs. distance to the conference; b, attendance vs. Gross national income per capita. Gray shading  
129 regions in b denote 95% confidence intervals for a linear regression.



130 **4. What controls the in-person EGU assembly participation?**

131 Our data reveals that attendance at EGU's General Assembly is primarily and  
132 consistently controlled by income metrics (GNI), with the strongest correlation ever  
133 recorded in the past three years (Fig. 1, 2022-2024). Distance to the conference site  
134 also influences attendance, albeit with a weaker correlation. In contrast, a country's  
135 total population has historically shown a poor correlation with attendance (Figs. 1 and  
136 2).

137 When comparing countries with similar populations and distances to the  
138 conference site, it becomes evident that income stands out as the main influencing  
139 factor in attendance (Fig. 2a). Nations with similar distances to the conference tend to  
140 exhibit higher participation rates with increasing GNI (Fig 2a). Examples include, from  
141 lower to higher GNI, Pakistan, South Korea, and the USA. This pattern is disrupted by  
142 populous countries such as India and China. Similarly, a similar trend is observed  
143 among countries with comparable populations. For instance, Ethiopia and the  
144 Philippines have significantly fewer participants compared to Japan (Fig 2b). In this  
145 context, our compilation reveals that attendance is dictated by a power-law  
146 relationship with income, with wealthier nations having two to three orders of  
147 magnitude more participants than poorer countries (Fig. 2b).

148 Under an income-independent participation scenario, we would expect to see  
149 participation depending only on distance and population. To identify the impact of  
150 income, the map in Figure 3 shows the relative representation of each country in the  
151 EGU assembly of 2019 after normalizing for distance and population. Notably,  
152 countries in Europe, northern North America, and Oceania (the Global North) exhibit  
153 the highest representation. Not coincidentally, these are the countries with the highest  
154 GNI per capita values (Fig. 2b; World Bank, 2024). Conversely, numerous countries  
155 in Latin America, Africa, and Asia are moderately to highly underrepresented in the  
156 conference. Based on correlation metrics (Fig. 1) and attendance plots (Fig. 2a), the  
157 distance from the conference venue can be ruled out as the primary reason behind  
158 representativity. From a global perspective (Fig. 3), curves of equidistance reveal that  
159 countries located at comparable distances from Austria present varying levels of  
160 representation. For instance, despite all being approximately 7,500 km away, India  
161 and nations in central Africa are notably underrepresented, while Canada stands out



162 as overrepresented in conference attendance (Fig. 3). Additionally, Australia, despite  
163 being one of the most distant countries from Austria, maintains a high level of  
164 representation in the event (Figs. 2b and 3).

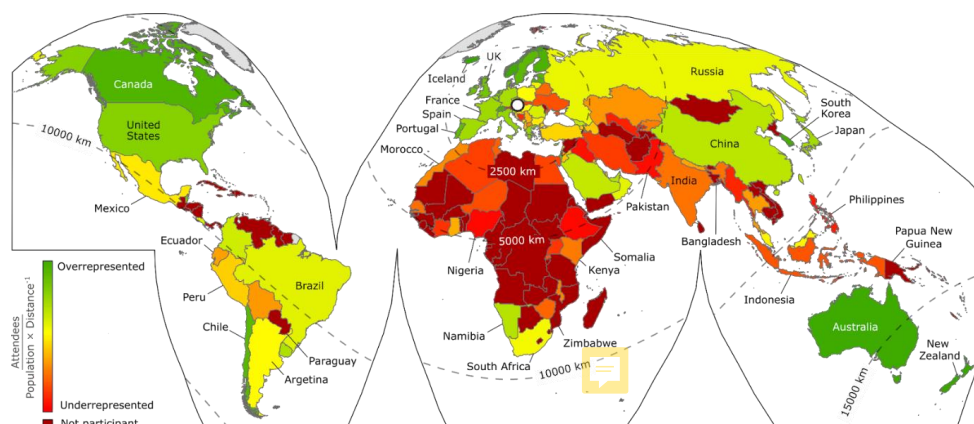

165  
166 **Figure 3.** Representation attendance map for EGU General Assembly 2019 corrected for both distance and  
167 population. Dashed lines represent the distance to EGU's conference site in Vienna, Austria.

168 **Ultimately, what controls attendance in the in-person EGU assembly is money.**  
169 With registration fees ranging from €525 to €765 for non-students in 2024, the  
170 economic burden varies significantly across countries. **For instance, in our home**  
171 **country Brazil, registration costs can amount to nearly three times the monthly**  
172 **minimum wage. In African nations like Angola, Nigeria, and the Democratic Republic**  
173 **of Congo, fees can exceed ten times the monthly minimum wage. In contrast, in**  
174 **Canada, fees equate to roughly half of the monthly minimum wage.** In addition, travel  
175 expenses are generally much higher than registration fees, which are only a fraction  
176 of the total cost. Additional expenses including transportation, accommodation, and  
177 meals, priced in the local currency (euros), significantly add to the overall financial  
178 commitment of participation.

179

## 180 **5. What can be done about it?**

181 It is clear that the European Geoscientists Union acknowledges the importance  
182 of diversity and is actively working towards a more equitable future. In 2018, the EGU  
183 Council established an equality, diversity, and inclusion (EDI) Committee to raise  
184 awareness and promote EDI initiatives (EGU, 2024b). Similar efforts have been



185 observed in other geoscience conferences. For instance, the American Geophysical  
186 Union Meeting, the world's largest geoscience conference, also adopted a Diversity &  
187 Inclusion Strategic Plan in 2018 (AGU, 2024).

188 Additionally, since the COVID-19 pandemic in 2020, the EGU introduced a  
189 virtual version of the meeting. This version offers lower fees, and free enrollment for  
190 (i) undergraduate or master students and (ii) low- & lower-middle-income countries.  
191 These initiatives are readily observed in correlation metrics for the virtual version of  
192 the EGU assembly, which show record-breaking increased  $\rho$  for population and  
193 decreased  $\rho$  for GNI and distance (Fig. 1a). Clearly, the virtual event increased  
194 accessibility and diversity by reducing the cost. However, in our and others' personal  
195 experience, the virtual event shows limited engagement and interaction with  
196 presentations and reduced networking opportunities between attendees. Furthermore,  
197 the EGU offers financial assistance to encourage participation in the in-person event.  
198 The Roland Shlich travel support includes a waiver of registration fees, reimbursement  
199 of the abstract processing charges, and travel expenditure aid up to €300. Even  
200 though this initiative is commendable and impactful, the overall cost of attending  
201 remains prohibitive for scholars from low-income countries.

202 To increase diversity at events like the EGU assembly and other geoscience  
203 events, we must alleviate financial barriers for attendees from lower-income countries.  
204 Here we explore some possibilities to achieve that goal. Firstly, consider rotating the  
205 conference's host country within Europe, making it more accessible to participants  
206 from different regions. Secondly, facilitate affordable accommodation options for  
207 scholars from lower-income countries through partnerships with hotels and hostels, or  
208 university housing. Thirdly, accepting donations from attendees that will serve to fund  
209 scientists from underrepresented countries. Lastly, establish a travel fund targeted at  
210 assisting attendees from lower-income countries and underrepresented regions (Fig.  
211 3).

212 Our discussion around increasing diversity and representation cannot be limited  
213 to the EGU General Assembly or geoscience conferences in general; rather, it must  
214 extend to acknowledging how conference attendance perpetuates barriers to  
215 inclusivity within our community. The attendance patterns in the EGU assembly  
216 highlight the prevalence of the Global North (i.e. developed) countries, which reflects





217 the historical dominance of these societies in shaping the field of geosciences until the  
218 present.

219 Ethnic and cultural underrepresentation not only hinders the career  
220 advancement of marginalized groups but also underscores the persistent dominance  
221 of the Global North in many scientific fields, including geosciences (Rogers et al.,  
222 2022; Raja et al., 2022). Academic neo-colonialism is not only reflected in conference  
223 participation patterns, but it also extends to the selective prestige accorded to  
224 universities and journals and the imposition of curricula, educational systems,  
225 languages, and epistemologies on formerly colonized societies (Nagtegaal and de  
226 Bruin, 1994; Rogers et al., 2022).

227 To promote equal research opportunities and equitable conference attendance,  
228 structural changes are necessary. We need to recognize and praise the true  
229 achievements and potential of scholars from outside the Global North. North-South  
230 scientific collaborations must become more symmetrical and founded on mutual  
231 respect, ensuring that knowledge production is collaborative, rather than extractive  
232 (Jeffrey, 2013; North et al., 2020; Rogers et al., 2022). Funding disparities ought to be  
233 tackled by the development of multi-partner and multi-national co-funded research  
234 projects (Jeffrey, 2013). Biases inherent in the peer review process of both papers and  
235 grant applications must be acknowledged and addressed (Rogers et al., 2022).  
236 Geoscience conferences need to be accessible to all, allowing scholars from  
237 underrepresented regions to share their research and perspectives, and to expand  
238 their networking opportunities. By recognizing and valuing the contributions of  
239 scientists from diverse backgrounds, we can move towards a more inclusive and  
240 equitable scientific community.

241

#### 242 **Author contribution**

243 **Francyne Bochi do Amarante:** Conceptualization, Formal analysis, Investigation,  
244 Project administration, Visualization, Writing – original draft preparation. **Maurício**  
245 **Barcelos Haag:** Conceptualization, Data curation, Formal analysis, Investigation,  
246 Methodology, Visualization, Writing – original draft preparation

247



248 **Competing interests**

249 The authors declare that they have no conflict of interest.

250

251 **References**

252 American Geophysical Union.: Diversity, Equity, and Inclusion at AGU. 2024.

253 <https://www.agu.org/learn-about-agu/about-agu/diversity-and-inclusion> (Accessed on March

254 22nd, 2024).

255 European Geosciences Union (EGU).: List of General Assemblies. 2024.

256 <https://www.egu.eu/meetings/general-assembly/meetings/> (Accessed on March 19, 2024).

257 European Geosciences Union (EGU).: Structure Equality, Diversity, and Inclusion

258 Committee. 2024b. <https://www.egu.eu/structure/committees-and-working-groups/edi/>

259 (Accessed on March 22nd, 2024).

260 Hong, L. & Page, S. E.: Groups of diverse problem solvers can outperform groups of high-

261 ability problem solvers. *Proceedings of the National Academy of Sciences*, 101(46), 16385–

262 16389, <https://doi.org/10.1073/pnas.0403723101>, 2004.

263 Jeffery, R.: Authorship in multi-disciplinary, multi-national North-South research projects:

264 issues of equity, capacity and accountability. *Compare: A Journal of Comparative and*

265 *International Education*, 44 (2), 208–229, <https://doi.org/10.1080/03057925.2013.829300>,

266 2023.

267 King, L., MacKenzie, L., Tadaki, M., Cannon, S., McFarlane, K., Reid, D., Koppes, M.:

268 Diversity in geoscience: Participation, behaviour, and the division of scientific labour at a

269 Canadian geoscience conference. *FACETS*, 3, 415–440, [https://doi.org/10.1139/facets-](https://doi.org/10.1139/facets-2017-0111)

270 [2017-0111](https://doi.org/10.1139/facets-2017-0111), 2018.

271 Medin, D. L. & Lee, C. D.: Diversity makes better science. *Association for Psychological*

272 *Science* <https://www.psychologicalscience.org/observer/diversity-makes-better-science>,

273 2012. (Accessed on March 22, 2024)

274 Nagtegaal, L. W., & de Bruin, R. E.: The French connection and other neo-colonial patterns

275 in the global network of science. *Research Evaluation*, 4, 119-127,

276 <https://doi.org/10.1093/rev/4.2.119>, 1994.

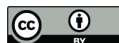

- 277 North, M.A., Hastie, W.W., Hoyer, L.: Out of Africa: The underrepresentation of African  
278 authors in high-impact geoscience literature. *Earth-Science Reviews*, 208, 103262,  
279 <https://doi.org/10.1016/j.earscirev.2020.103262>, 2020.
- 280 Raja, N.B., Dunne, E.M., Matiwane, A., Khan, T.M., Nätscher, P.S., Ghilardi, A.M.,  
281 Chattopadhyay, D.: Colonial history and global economics distort our understanding of deep-  
282 time biodiversity. *Nature Ecology and Evolution*, 6(2), 145–154,  
283 <https://doi.org/10.1038/s41559-021-01608-8>, 2022.
- 284 Rogers, S.L., Lau, L., Dowey, N., Sheikh, H., Williams, R.: Geology uprooted! Decolonising  
285 the curriculum for geologists. *Geoscience Communication* 5 (3), 189–204,  
286 <https://doi.org/10.5194/gc-5-189-2022>, 2022.
- 287 World Bank.: GNI per capita, PPP (current international \$). 2024.  
288 <https://data.worldbank.org/indicator/NY.GNP.PCAP.CD> (Accessed on March 20, 2024).
